# Supplementary material for: Comparison of different zinc precursors for the construction of zeolitic imidazolate framework-8 artificial shells on living cells
Source: Royal Society of Chemistry journal article supplement (doi:10.1039/c9sm01907c), 2019-11-21
Supplement: c9sm01907c1.pdf [file c9sm01907c1.pdf]

## Comparison of different zinc precursors for the construction of zeolitic imidazolate framework-8 artificial shells on living cells

Wei Chen, Shu Kong, Meng Lu, Fangming Chen, Wen Cai, Liping Du, Jian Wang and Chunsheng

Wu\*

Institute of Medical Engineering, Department of Biophysics, School of Basic Medical Sciences,  
Health Science Center, Xi'an Jiaotong University, Xi'an, Shaanxi, 710061, China

\* Correspondence: wuchunsheng@xjtu.edu.cn

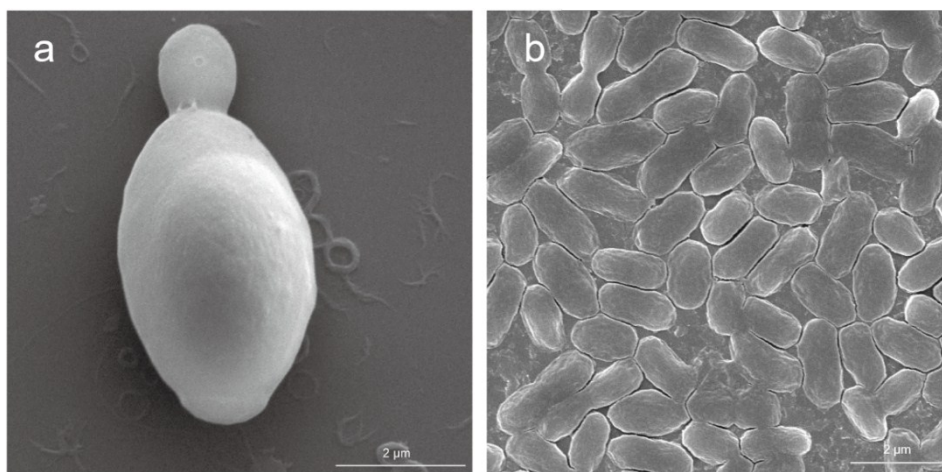

Fig. S1 SEM image of (a) native yeast cell and (b) native *E.coli* cells.

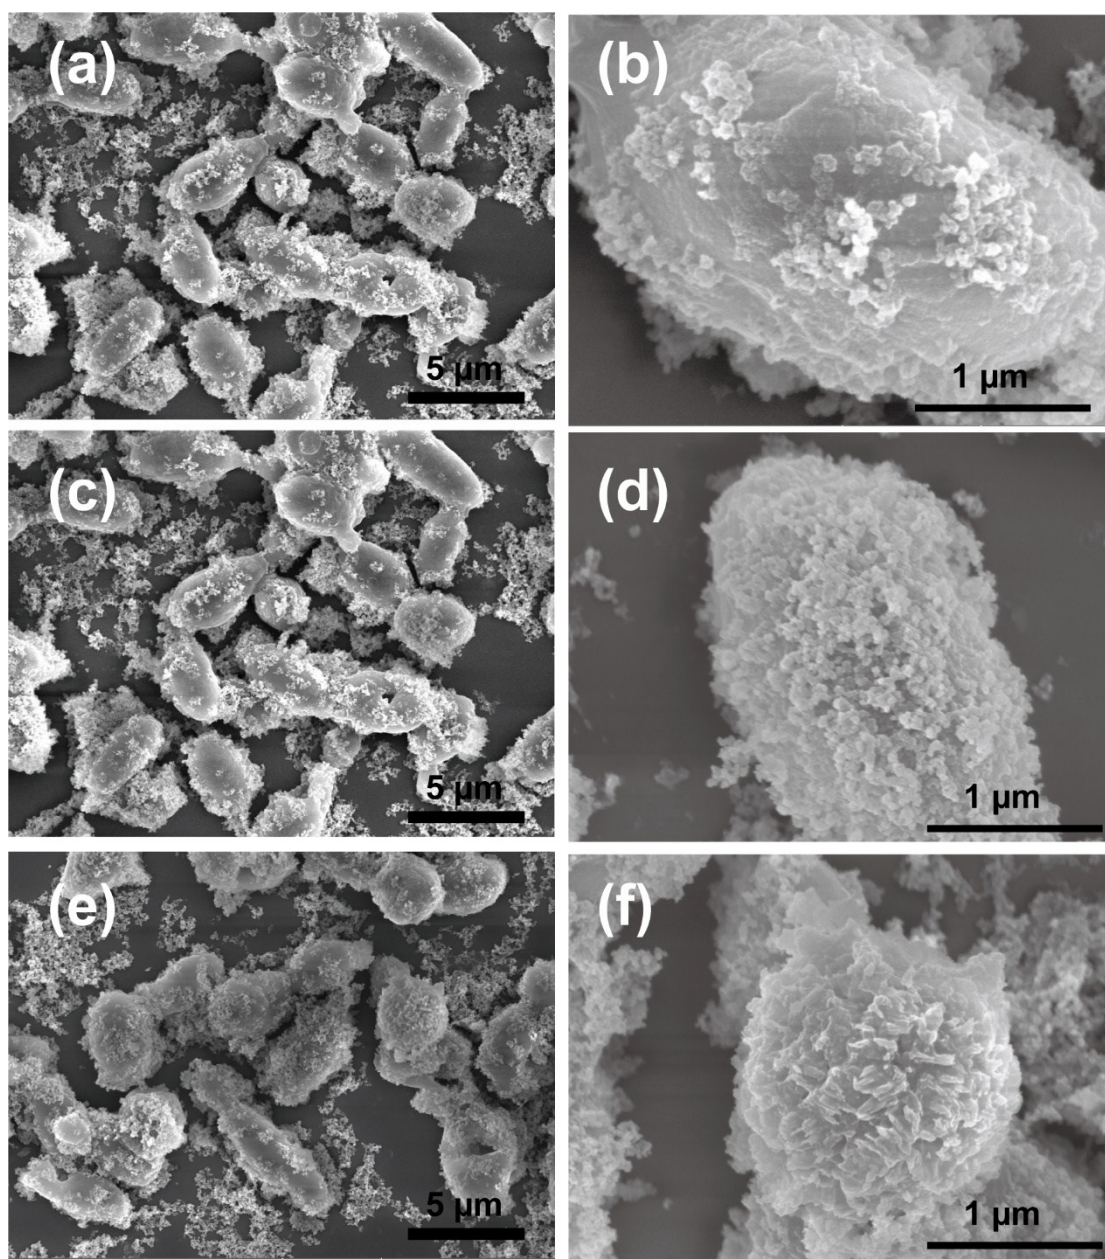

Fig. S2 SEM images of ZIF-8 coated yeast cells with different zinc salts precursors with different magnification: (a) and (b) yeast@ZIF-8-n, (c) and (d) yeast@ZIF-8-s, (e) and (f) yeast@ZIF-8-a.

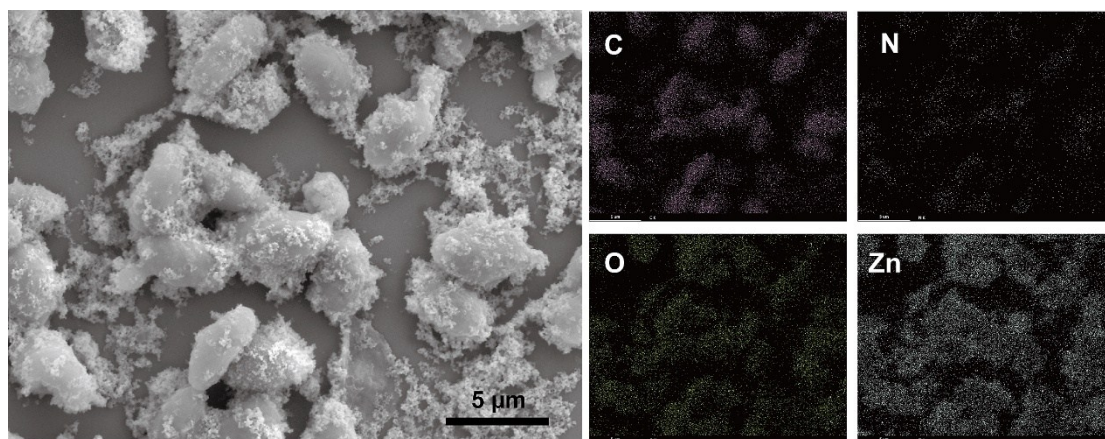

Fig. S3 EDS mapping of yeast@ZIF-8-n.

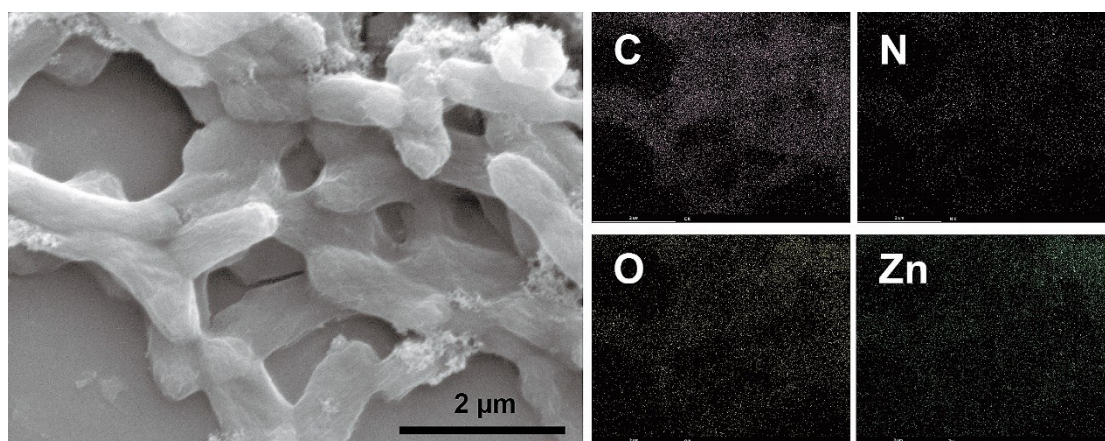

Fig. S4 SEM image and EDS mapping of *E.Coli*@ZIF-8.

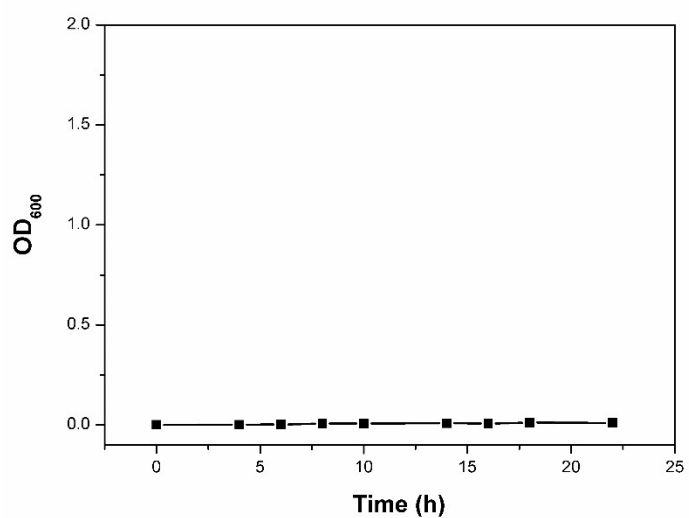

Fig. S5  $\text{OD}_{600}$  v.s. YM medium (yeast culture medium).



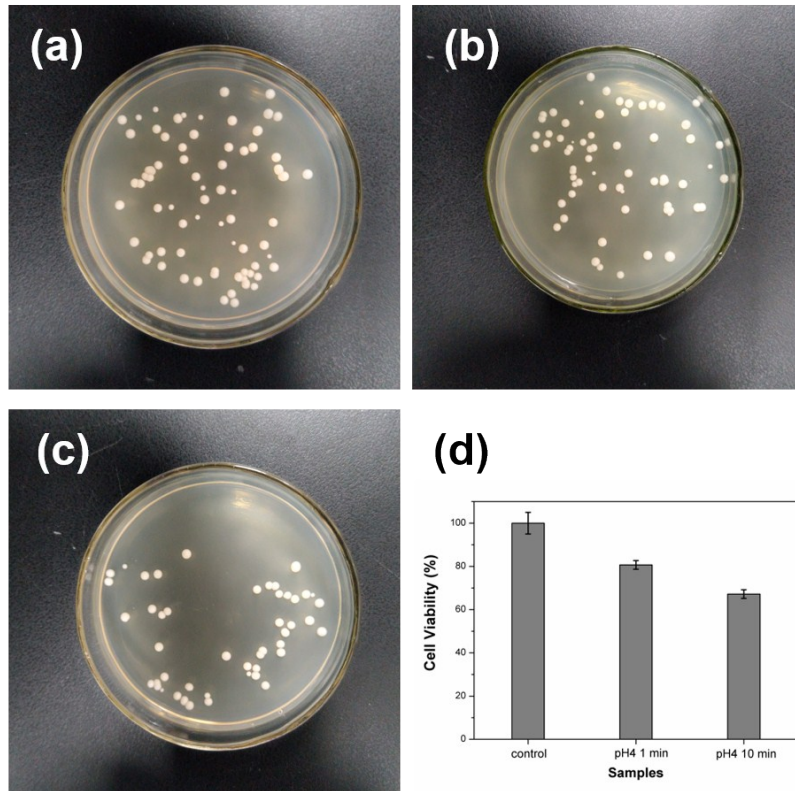

Fig. S6 Photographs of agar plates onto which yeast treated with pH 4 buffer for different time: (a) 0 min, (b) 1 min, and (c) 10 min. (d) Cell viability of yeast when treated with pH 4 buffer.
